# Supplementary material for: Chemopreventive and Chemotherapeutic Effects of Intravesical Silibinin against Bladder Cancer by Acting on Mitochondria
Source: Oxford University Press journal article supplement (doi:10.1158/1535-7163.mct-10-0577), 2011-01-01
Supplement: 15357163mct100577-sup-0577_sup_fig_legends.pdf [file 15357163mct100577-sup-0577_sup_fig_legends.pdf]

## **Supplementary figure legends**

**Supplementary Figure S1.** Experimental design and protocol to study the chemotherapeutic effect of intravesical silibinin on carcinogenesis and progression of bladder cancer initiated by MNU in female Sprague-Dawley rats.

**Supplementary Figure S2.** Growth inhibition and apoptotic effect of silibinin on 5637 cells. **A**, cells were incubated with various concentrations of silibinin for different periods. Then, the cell viability was determined using MTT assay. **B** and **C**, representative pictures of phosphatidylserine exposure and DNA fragmentation in response to different doses of silibinin treatment for 48 h, as detected by Annexin V/PI labeling assay and TUNEL assay. **D**, quantitative data for the percentage of TUNEL positive cells. All results were obtained from three independent experiments. SB, silibinin. The scale bar represents 20  $\mu\text{m}$ . Error bars represent SEs.  $*P < 0.05$ .

**Supplementary Figure S3.** Immunolocalization of AIF after silibinin exposure. Cells were incubated with 200  $\mu\text{M}$  silibinin and/or 80  $\mu\text{M}$  z-VAD-fmk for 48h, then were fixed and permeabilized, followed by immunostaining with anti-AIF (green fluorescence). In combination treatment, z-VAD-fmk was added 1h prior to silibinin treatment. The scale bar represents 10  $\mu\text{m}$ .

**Supplementary Figure S4.** Effects of intravesical silibinin on diet intake and

apoptosis in SD rat. **A**, the average diet consumption of each rat was recorded weekly during the experiment. **B**, quantitative data for percentage of TUNEL positive cells in each group. Error bars represent SEs.  $*P < 0.05$ .
